# Supplementary material for: Meta-analysis of multidecadal biodiversity trends in Europe
Source: PubMed Central journal article supplement (PMC7359034; doi:10.1038/s41467-020-17171-y), 2020-07-13
Supplement: 41467_2020_17171_MOESM1_ESM.pdf [file 41467_2020_17171_MOESM1_ESM.pdf]

# Meta-analysis of multidecadal biodiversity trends in Europe

Pilotto *et al.* Nature Communications

## SUPPLEMENTARY INFORMATION

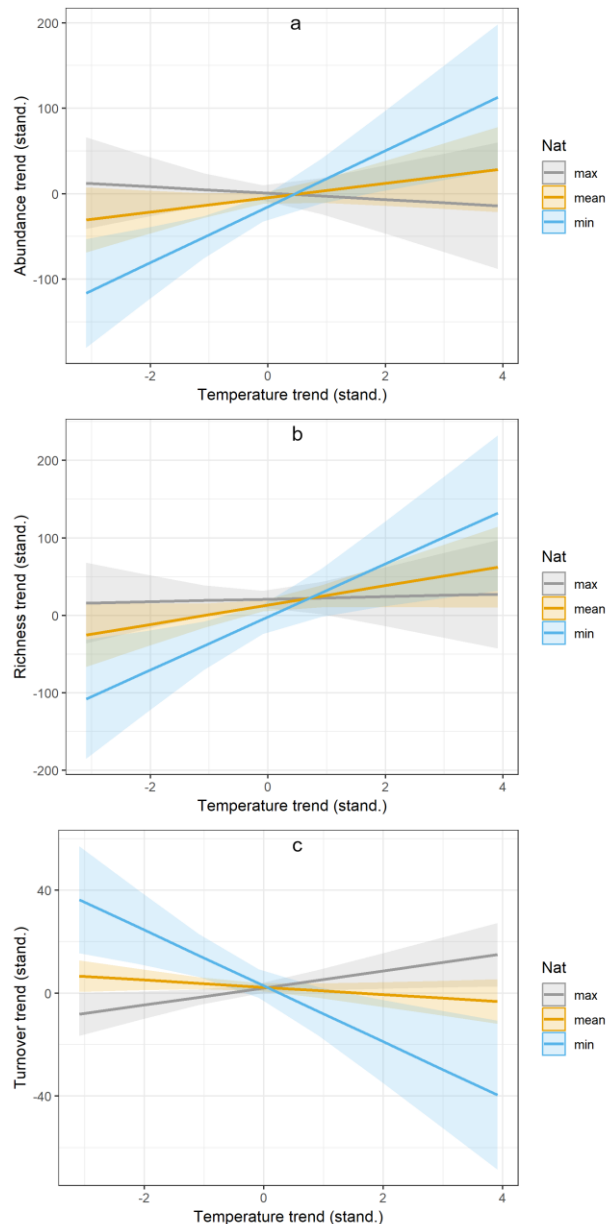

**Supplementary Figure 1. Effect of site naturalness and temperature trends on biodiversity trends.** Interactions between site naturalness and temperature trends in driving the trends in abundance (a), richness (b) and turnover (c), as resulting from meta-analysis mixed models, based on S-statistics (for further details see methods). Source data are provided as a Source Data file.

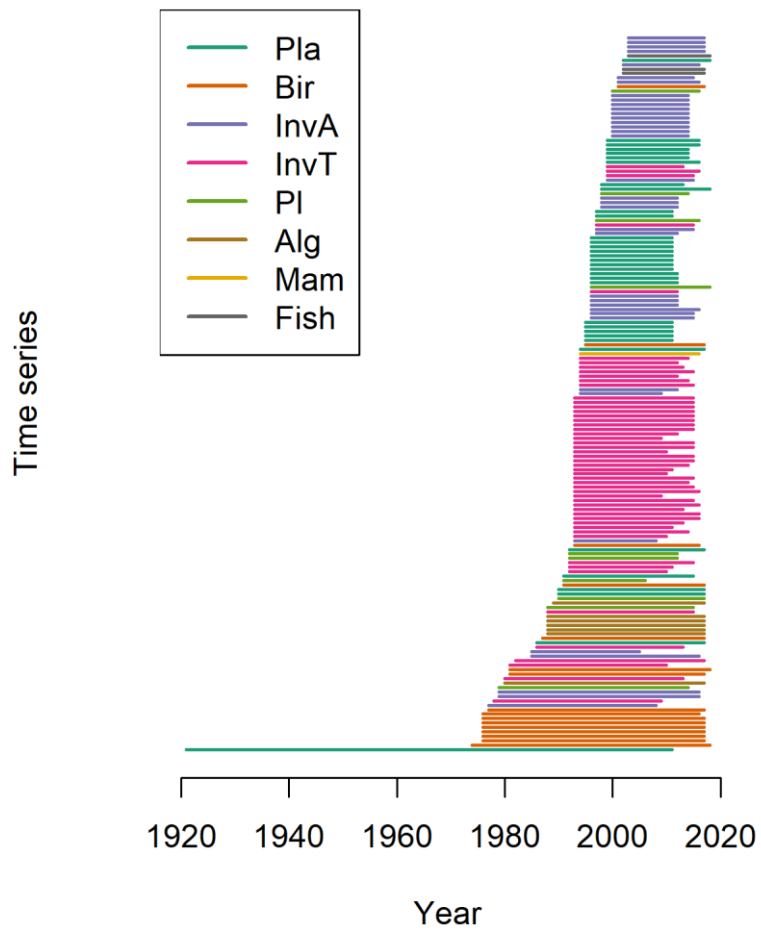

**Supplementary Figure 2. Temporal scope of the study.** Overview of the temporal distribution and span of the studied time series. Pla: terrestrial plants; Bir: birds; InvA: aquatic invertebrates; InvT: terrestrial invertebrates; Pl: plankton; Alg: benthic algae; Mam: mammals; Fish: fish. Source data are provided as a Source Data file.

**Supplementary Table 1. Studied time series.** Distribution of time series among biogeoregions, realms and taxonomic groups. MA: marine and transitional zone; FW: freshwater; TE: terrestrial.

|                           | Adriatic |    |    | Alpine |    |    | Atlantic |    |    | Black Sea |    |    | Boreal |    |    | Continental |    |    | Mediterranean |    |    | North Sea |    |    | Pannonian |    |    |
|---------------------------|----------|----|----|--------|----|----|----------|----|----|-----------|----|----|--------|----|----|-------------|----|----|---------------|----|----|-----------|----|----|-----------|----|----|
|                           | MA       | FW | TE | MA     | FW | TE | MA       | FW | TE | MA        | FW | TE | MA     | FW | TE | MA          | FW | TE | MA            | FW | TE | MA        | FW | TE | MA        | FW | TE |
| Benthic algae             | -        | -  | -  | -      | 6  | -  | -        | -  | -  | -         | -  | -  | -      | 1  | -  | -           | -  | -  | -             | -  | -  | -         | -  | -  | -         | -  | -  |
| Birds                     | -        | -  | -  | -      | -  | -  | 1        | -  | 3  | 4         | 1  | -  | -      | -  | -  | 4           | -  | 1  | -             | 1  | 1  | -         | -  | -  | -         | -  | -  |
| Fish                      | -        | -  | -  | -      | -  | -  | -        | 2  | -  | -         | -  | -  | -      | -  | -  | -           | -  | 1  | -             | -  | -  | -         | -  | -  | -         | -  | -  |
| Aquatic invertebrates     | -        | -  | -  | -      | 3  | -  | 1        | 8  | -  | -         | -  | -  | -      | 14 | -  | -           | 4  | -  | 1             | -  | -  | 6         | -  | -  | -         | -  | -  |
| Terrestrial invertebrates | -        | -  | -  | -      | -  | 3  | -        | -  | 34 | -         | -  | -  | -      | -  | 14 | -           | -  | 2  | -             | -  | -  | -         | -  | -  | -         | -  | -  |
| Mammals                   | -        | -  | -  | -      | -  | -  | -        | -  | 1  | -         | -  | -  | -      | -  | -  | -           | -  | -  | -             | -  | -  | -         | -  | -  | -         | -  | -  |
| Plankton                  | 1        | -  | -  | -      | 4  | -  | -        | 1  | -  | -         | -  | -  | -      | -  | -  | 2           | -  | 1  | 1             | -  | -  | -         | -  | -  | -         | -  | -  |
| Plants                    | -        | -  | -  | -      | -  | 17 | -        | -  | 5  | -         | -  | -  | -      | -  | 3  | -           | -  | 5  | -             | -  | 3  | -         | -  | -  | -         | -  | 1  |

**Supplementary Table 2. Influence of climatic trends and site characteristics on biodiversity trends.** Results of the information-theoretic approach for meta-analysis mixed model selection and multi-model inference, showing the model-averaged coefficients (estimate and 95% C.I.) and the relative importance (sum of Akaike weights, see main text for explanation) of each explanatory variable.

| <b>Abundance (average variation explained: 11%):</b> |                 |                 |       |                   |
|------------------------------------------------------|-----------------|-----------------|-------|-------------------|
|                                                      | <b>Estimate</b> | <b>C.I. 95%</b> |       | <b>Importance</b> |
| Intercept                                            | -3.39           | -9.33           | 2.55  | 1.00              |
| Temperature                                          | 7.32            | -0.30           | 14.94 | 1.00              |
| Naturalness                                          | 7.97            | 1.82            | 14.11 | 1.00              |
| Latitude                                             | -0.49           | -2.67           | 1.70  | 0.21              |
| Study length                                         | -0.35           | -2.58           | 1.87  | 0.17              |
| Precipitation                                        | 0.28            | -1.59           | 2.15  | 0.17              |
| <b>Richness (average variation explained: 27%):</b>  |                 |                 |       |                   |
|                                                      | <b>Estimate</b> | <b>C.I. 95%</b> |       | <b>Importance</b> |
| Intercept                                            | 14.13           | 7.10            | 21.16 | 1.00              |
| Temperature                                          | 14.44           | 6.06            | 22.83 | 1.00              |
| Longitude                                            | 12.75           | 4.84            | 20.66 | 1.00              |
| Naturalness                                          | 1.77            | -4.12           | 7.66  | 0.33              |
| Latitude                                             | 0.82            | -2.43           | 4.07  | 0.21              |
| Elevation                                            | -0.70           | -3.66           | 2.25  | 0.20              |
| Precipitation                                        | 0.55            | -1.85           | 2.96  | 0.12              |
| Study length                                         | 0.36            | -1.48           | 2.21  | 0.10              |
| <b>Diversity (average variation explained: 10%):</b> |                 |                 |       |                   |
|                                                      | <b>Estimate</b> | <b>C.I. 95%</b> |       | <b>Importance</b> |
| Intercept                                            | 6.28            | 0.20            | 12.36 | 1.00              |
| Longitude                                            | 11.24           | 4.54            | 17.94 | 1.00              |
| Precipitation                                        | -6.84           | -16.14          | 2.46  | 0.87              |
| Elevation                                            | -3.76           | -10.31          | 2.80  | 0.73              |
| Study length                                         | 1.97            | -4.03           | 7.96  | 0.36              |
| Latitude                                             | -0.24           | -1.44           | 0.96  | 0.10              |
| Temperature                                          | 0.15            | -0.79           | 1.10  | 0.09              |
| <b>Turnover (average variation explained: 67%):</b>  |                 |                 |       |                   |
|                                                      | <b>Estimate</b> | <b>C.I. 95%</b> |       | <b>Importance</b> |
| Intercept                                            | 2.02            | 0.63            | 3.40  | 1.00              |
| Elevation                                            | 1.22            | 0.23            | 2.20  | 1.00              |
| Longitude                                            | -1.04           | -3.31           | 1.23  | 0.59              |
| Latitude                                             | 0.55            | -0.81           | 1.90  | 0.52              |
| Precipitation                                        | 0.44            | -0.78           | 1.66  | 0.46              |
| Naturalness                                          | -0.50           | -2.15           | 1.14  | 0.33              |
| Temperature                                          | 0.20            | -0.51           | 0.91  | 0.29              |
| Study length                                         | 0.02            | -0.10           | 0.14  | 0.07              |

**Supplementary notes:**

We ran a sensitivity analysis to assess the effect of the unbalanced design on the results of the meta-analysis mixed models. We randomly sampled the over-represented biotic groups within each biogeoregion to the maximum number of time series available for the other biotic groups within that biogeoregion (see Supplementary Table 1). For example, we randomly sampled eight Atlantic terrestrial invertebrate time series (out of 38), as aquatic invertebrates (the second most represented biotic group for the Atlantic region) had eight time series (Supplementary Table 1). We repeated the random sampling 5 times and, with those data, we re-run the meta-analysis mixed models for biogeoregions, as described in the main text. The same procedure was applied for the over-represented biogeoregions within each biotic group. The list of randomly sampled biotic groups and biogeoregions is reported in Supplementary Table 3.

Eventually, 96 out of 100 runs showed the same results as the ones obtained for the full analysis that is presented in the main text (Supplementary Table 3). The only four exceptions were found for: terrestrial invertebrate richness (run 5), terrestrial invertebrate turnover (run 1) and abundance in the Atlantic region (runs 3 and 5; Supplementary Table 3). Due to such a high level of concordance, we are confident that our results are not driven by the most-represented biotic groups and biogeoregion, and are thus robust against unbalanced design.

**Supplementary Table 3.** Sensitivity analysis. The table reports the results of meta-analysis mixed models for biotic groups and biogeoregions, after five random sampling (runs 1 to 5) of the most-represented biotic groups and biogeoregions. Blue: significantly increasing trends ( $p \leq 0.05$ ); orange: significantly declining trends ( $p \leq 0.05$ ); black: no significant trends ( $p > 0.05$ ); italics and red: results that contrast those of the full analysis as reported in the main text.

| Random sampling:                                       | Model results for BIOTIC GROUP: | Metric:   | Run 1 |       | Run 2 |       | Run 3 |       | Run 4 |       | Run 5 |       |
|--------------------------------------------------------|---------------------------------|-----------|-------|-------|-------|-------|-------|-------|-------|-------|-------|-------|
|                                                        |                                 |           | z     | p     | z     | p     | z     | p     | z     | p     | z     | p     |
| Boreal aquatic invertebrates (n = 8, out of 14)        | Aquatic invertebrates           | Abundance | 0.15  | 0.880 | 0.12  | 0.910 | 0.08  | 0.940 | 0.01  | 0.990 | 0.02  | 0.980 |
|                                                        |                                 | Richness  | 2.00  | 0.044 | 1.95  | 0.050 | 2.17  | 0.030 | 2.03  | 0.042 | 2.08  | 0.037 |
|                                                        |                                 | Diversity | 2.02  | 0.045 | 2.23  | 0.026 | 2.03  | 0.042 | 2.02  | 0.043 | 2.57  | 0.010 |
|                                                        |                                 | Turnover  | -0.48 | 0.632 | -0.38 | 0.704 | -0.86 | 0.392 | -1.12 | 0.262 | -0.75 | 0.455 |
| Atlantic terrestrial invertebrates (n = 14, out of 34) | Terrestrial invertebrates       | Abundance | -2.66 | 0.008 | -2.38 | 0.017 | -3.15 | 0.002 | -3.07 | 0.002 | -2.90 | 0.004 |
|                                                        |                                 | Richness  | 0.05  | 0.960 | 1.56  | 0.118 | 0.67  | 0.500 | 0.49  | 0.624 | 2.16  | 0.031 |
|                                                        |                                 | Diversity | 0.51  | 0.611 | 1.59  | 0.112 | 0.95  | 0.339 | 0.36  | 0.717 | 1.08  | 0.281 |
|                                                        |                                 | Turnover  | 2.04  | 0.040 | 1.54  | 0.123 | 1.10  | 0.269 | 1.81  | 0.070 | 1.90  | 0.058 |
| Alpine plants (n = 5, out of 17)                       | Plants                          | Abundance | 0.39  | 0.700 | 0.35  | 0.727 | 0.50  | 0.620 | 0.51  | 0.611 | 0.33  | 0.734 |
|                                                        |                                 | Richness  | 0.28  | 0.781 | 0.02  | 0.983 | 0.27  | 0.789 | 0.10  | 0.920 | 0.22  | 0.822 |
|                                                        |                                 | Diversity | 0.31  | 0.760 | 0.24  | 0.809 | 0.35  | 0.724 | 0.48  | 0.630 | 0.23  | 0.820 |
|                                                        |                                 | Turnover  | 2.19  | 0.029 | 2.40  | 0.016 | 2.43  | 0.015 | 2.79  | 0.005 | 2.27  | 0.023 |
| Atlantic terrestrial invertebrates (n = 8, out of 34)  | Atlantic                        | Abundance | -2.23 | 0.026 | -2.06 | 0.040 | -1.65 | 0.099 | -2.37 | 0.018 | -1.82 | 0.068 |
|                                                        |                                 | Richness  | -0.02 | 0.985 | -1.21 | 0.226 | -0.56 | 0.579 | -1.22 | 0.223 | -1.12 | 0.262 |
|                                                        |                                 | Diversity | 0.31  | 0.753 | 0.59  | 0.556 | 0.90  | 0.368 | 0.66  | 0.507 | 0.76  | 0.446 |
|                                                        |                                 | Turnover  | 0.01  | 0.999 | 0.01  | 1.000 | 0.01  | 0.999 | 0.01  | 0.999 | 0.01  | 0.999 |
| Alpine plants (n = 6, out of 17)                       | Alpine                          | Abundance | -0.89 | 0.374 | -1.50 | 0.135 | -1.06 | 0.288 | -0.98 | 0.329 | -1.54 | 0.124 |
|                                                        |                                 | Richness  | 0.76  | 0.450 | 0.99  | 0.320 | 1.11  | 0.267 | 0.61  | 0.544 | 1.19  | 0.234 |
|                                                        |                                 | Diversity | -0.86 | 0.390 | -1.20 | 0.231 | -0.71 | 0.477 | -0.96 | 0.336 | -0.80 | 0.425 |
|                                                        |                                 | Turnover  | 3.04  | 0.002 | 1.96  | 0.050 | 2.23  | 0.025 | 2.21  | 0.027 | 3.01  | 0.003 |

**Supplementary Methods:**

The following pages report the standardized questionnaire that was filled in by the data providers to deliver information on local anthropogenic pressures at the study sites.

# ILTER - biodiversity study

\* Required

1. Contact person: \*

---

2. Email: \*

---

3. Site: \*

---

---

---

---

---

4. Studied biotic group(s): \*

---

---

---

---

---

5. Ecosystem \*

Mark only one oval.

Freshwater      *After the last question in this section, skip to question 70.*

Marine and transitional zone      *After the last question in this section, skip to question 157.*

Terrestrial      *After the last question in this section, skip to question 13.*

## About the dataset

---

6. Is the taxonomic list consistent throughout the whole study period (i.e. same taxonomic resolution during the whole study period, no synonyms)? \*

Mark only one oval.

Yes

No

Don't know



7. **Has the taxonomic identification been carried out by the same person or by people with similar expertise during the whole study period? \***

*Mark only one oval.*

- Yes  
 No  
 Don't know

8. **Was the sampling method changed during the study period? \***

*Mark only one oval.*

- Yes  
 No  
 Don't know

9. **Comments:**

---

---

---

---

---

10. **Are there neobiota among the surveyed taxa? \***

*Mark only one oval.*

- Yes  
 No  
 Don't know

11. **Are there red-listed species among the surveyed taxa? \***

*Mark only one oval.*

- Yes  
 No  
 Don't know

12. **Would you be able to provide information on these traits for the studied taxa?**

*Check all that apply.*

- Maximum organism size  
 Life-cycle duration  
 Number of life cycles per year  
 Life history strategy

## **Impacts at the site - Terrestrial ecosystems**

You are asked to estimate the impact of a series of pressures acting at the site: 1) urban/industrial, 2) agriculture/pasture/forestry, 3) mining/extraction, 4) recreational activities, 5) hunting, 6) artificial elements of landscape (e.g. wind turbines), 7) pollution/nutrients.

You can also indicate whether there are additional pressures or whether major changes occurred at the site during the study period.

At the end of the section you are asked to estimate the overall quality (=naturalness) of the site.

# Urban/industrial

---

**13. Estimate the intensity of urban/industrial impacts at the site:**

If intensity was constant or null throughout the whole study, fill in the first row only. If intensity changed during the study period, identify periods of constant impact (maximum 5 periods) and provide an estimate of the impact in each of the identified periods (rows from 2 to 6)  
*Mark only one oval per row.*

|                                             | Null                  | Weak impact           | Medium impact         | Strong impact         |
|---------------------------------------------|-----------------------|-----------------------|-----------------------|-----------------------|
| Constant throughout the whole study         | <input type="radio"/> | <input type="radio"/> | <input type="radio"/> | <input type="radio"/> |
| Non-constant throughout the study: Period 1 | <input type="radio"/> | <input type="radio"/> | <input type="radio"/> | <input type="radio"/> |
| Non-constant throughout the study: Period 2 | <input type="radio"/> | <input type="radio"/> | <input type="radio"/> | <input type="radio"/> |
| Non-constant throughout the study: Period 3 | <input type="radio"/> | <input type="radio"/> | <input type="radio"/> | <input type="radio"/> |
| Non-constant throughout the study: Period 4 | <input type="radio"/> | <input type="radio"/> | <input type="radio"/> | <input type="radio"/> |
| Non-constant throughout the study: Period 5 | <input type="radio"/> | <input type="radio"/> | <input type="radio"/> | <input type="radio"/> |

**14. If the intensity of impact changed during the study period, indicate the start and end of PERIOD 1:**

year start, year end. E.g.: 1990, 1995

---

**15. If the intensity of impact changed during the study period, indicate the start and end of PERIOD 2:**

year start, year end. E.g.: 1990, 1995

---

**16. If the intensity of impact changed during the study period, indicate the start and end of PERIOD 3:**

year start, year end. E.g.: 1990, 1995

---

**17. If the intensity of impact changed during the study period, indicate the start and end of PERIOD 4:**

year start, year end. E.g.: 1990, 1995

---

**18. If the intensity of impact changed during the study period, indicate the start and end of PERIOD 5:**

year start, year end. E.g.: 1990, 1995

---

19. Comments

---

---

---

---

---

## **Agriculture/pasture/forestry**

---

**20. Estimate the intensity of the agriculture/pasture/forestry impact at the site:**

If intensity was constant or null throughout the whole study, fill in the first row only. If intensity changed during the study period, identify periods of constant impact (maximum 5 periods) and provide an estimate of the impact in each of the identified periods (rows from 2 to 6)  
*Mark only one oval per row.*

|                                             | Null                  | Weak impact           | Medium impact         | Strong impact         |
|---------------------------------------------|-----------------------|-----------------------|-----------------------|-----------------------|
| Constant throughout the whole study         | <input type="radio"/> | <input type="radio"/> | <input type="radio"/> | <input type="radio"/> |
| Non-constant throughout the study: Period 1 | <input type="radio"/> | <input type="radio"/> | <input type="radio"/> | <input type="radio"/> |
| Non-constant throughout the study: Period 2 | <input type="radio"/> | <input type="radio"/> | <input type="radio"/> | <input type="radio"/> |
| Non-constant throughout the study: Period 3 | <input type="radio"/> | <input type="radio"/> | <input type="radio"/> | <input type="radio"/> |
| Non-constant throughout the study: Period 4 | <input type="radio"/> | <input type="radio"/> | <input type="radio"/> | <input type="radio"/> |
| Non-constant throughout the study: Period 5 | <input type="radio"/> | <input type="radio"/> | <input type="radio"/> | <input type="radio"/> |

**21. If the intensity of impact changed during the study period, indicate the start and end of PERIOD 1:**

year start, year end. E.g.: 1990, 1995

---

**22. If the intensity of impact changed during the study period, indicate the start and end of PERIOD 2:**

year start, year end. E.g.: 1990, 1995

---

**23. If the intensity of impact changed during the study period, indicate the start and end of PERIOD 3:**

year start, year end. E.g.: 1990, 1995

---

**24. If the intensity of impact changed during the study period, indicate the start and end of PERIOD 4:**

year start, year end. E.g.: 1990, 1995

---

25. **If the intensity of impact changed during the study period, indicate the start and end of PERIOD 5:**

year start, year end. E.g.: 1990, 1995

---

26. **Comments**

---



---



---



---



---

## **Mining/extraction**

---

27. **Estimate the intensity of the mining/extraction impact at the site:**

If intensity was constant or null throughout the whole study, fill in the first row only. If intensity changed during the study period, identify periods of constant impact (maximum 5 periods) and provide an estimate of the impact in each of the identified periods (rows from 2 to 6)

*Mark only one oval per row.*

|                                             | Null                  | Weak impact           | Medium impact         | Strong impact         |
|---------------------------------------------|-----------------------|-----------------------|-----------------------|-----------------------|
| Constant throughout the whole study         | <input type="radio"/> | <input type="radio"/> | <input type="radio"/> | <input type="radio"/> |
| Non-constant throughout the study: Period 1 | <input type="radio"/> | <input type="radio"/> | <input type="radio"/> | <input type="radio"/> |
| Non-constant throughout the study: Period 2 | <input type="radio"/> | <input type="radio"/> | <input type="radio"/> | <input type="radio"/> |
| Non-constant throughout the study: Period 3 | <input type="radio"/> | <input type="radio"/> | <input type="radio"/> | <input type="radio"/> |
| Non-constant throughout the study: Period 4 | <input type="radio"/> | <input type="radio"/> | <input type="radio"/> | <input type="radio"/> |
| Non-constant throughout the study: Period 5 | <input type="radio"/> | <input type="radio"/> | <input type="radio"/> | <input type="radio"/> |

28. **If the intensity of impact changed during the study period, indicate the start and end of PERIOD 1:**

year start, year end. E.g.: 1990, 1995

---

29. **If the intensity of impact changed during the study period, indicate the start and end of PERIOD 2:**

year start, year end. E.g.: 1990, 1995

---

30. **If the intensity of impact changed during the study period, indicate the start and end of PERIOD 3:**

year start, year end. E.g.: 1990, 1995

---

31. If the intensity of impact changed during the study period, indicate the start and end of PERIOD 4:

year start, year end. E.g.: 1990, 1995

---

32. If the intensity of impact changed during the study period, indicate the start and end of PERIOD 5:

year start, year end. E.g.: 1990, 1995

---

33. Comments

---



---



---



---



---

## Recreational activities

---

34. Estimate the intensity of recreational activities at the site:

If intensity was constant or null throughout the whole study, fill in the first row only. If intensity changed during the study period, identify periods of constant impact (maximum 5 periods) and provide an estimate of the impact in each of the identified periods (rows from 2 to 6)

*Mark only one oval per row.*

|                                             | Null                  | Weak impact           | Medium impact         | Strong impact         |
|---------------------------------------------|-----------------------|-----------------------|-----------------------|-----------------------|
| Constant throughout the whole study         | <input type="radio"/> | <input type="radio"/> | <input type="radio"/> | <input type="radio"/> |
| Non-constant throughout the study: Period 1 | <input type="radio"/> | <input type="radio"/> | <input type="radio"/> | <input type="radio"/> |
| Non-constant throughout the study: Period 2 | <input type="radio"/> | <input type="radio"/> | <input type="radio"/> | <input type="radio"/> |
| Non-constant throughout the study: Period 3 | <input type="radio"/> | <input type="radio"/> | <input type="radio"/> | <input type="radio"/> |
| Non-constant throughout the study: Period 4 | <input type="radio"/> | <input type="radio"/> | <input type="radio"/> | <input type="radio"/> |
| Non-constant throughout the study: Period 5 | <input type="radio"/> | <input type="radio"/> | <input type="radio"/> | <input type="radio"/> |

35. If the intensity of impact changed during the study period, indicate the start and end of PERIOD 1:

year start, year end. E.g.: 1990, 1995

---

36. If the intensity of impact changed during the study period, indicate the start and end of PERIOD 2:

year start, year end. E.g.: 1990, 1995

---

37. If the intensity of impact changed during the study period, indicate the start and end of PERIOD 3:

year start, year end. E.g.: 1990, 1995

---

38. If the intensity of impact changed during the study period, indicate the start and end of PERIOD 4:

year start, year end. E.g.: 1990, 1995

---

39. If the intensity of impact changed during the study period, indicate the start and end of PERIOD 5:

year start, year end. E.g.: 1990, 1995

---

40. Comments

---



---



---



---



---

## Hunting

---

41. Estimate the intensity of the impact of hunting at the site:

If intensity was constant or null throughout the whole study, fill in the first row only. If intensity changed during the study period, identify periods of constant impact (maximum 5 periods) and provide an estimate of the impact in each of the identified periods (rows from 2 to 6)  
*Mark only one oval per row.*

|                                             | Null                  | Weak impact           | Medium impact         | Strong impact         |
|---------------------------------------------|-----------------------|-----------------------|-----------------------|-----------------------|
| Constant throughout the whole study         | <input type="radio"/> | <input type="radio"/> | <input type="radio"/> | <input type="radio"/> |
| Non-constant throughout the study: Period 1 | <input type="radio"/> | <input type="radio"/> | <input type="radio"/> | <input type="radio"/> |
| Non-constant throughout the study: Period 2 | <input type="radio"/> | <input type="radio"/> | <input type="radio"/> | <input type="radio"/> |
| Non-constant throughout the study: Period 3 | <input type="radio"/> | <input type="radio"/> | <input type="radio"/> | <input type="radio"/> |
| Non-constant throughout the study: Period 4 | <input type="radio"/> | <input type="radio"/> | <input type="radio"/> | <input type="radio"/> |
| Non-constant throughout the study: Period 5 | <input type="radio"/> | <input type="radio"/> | <input type="radio"/> | <input type="radio"/> |

42. If the intensity of impact changed during the study period, indicate the start and end of PERIOD 2:

year start, year end. E.g.: 1990, 1995

---

43. If the intensity of impact changed during the study period, indicate the start and end of PERIOD 3:

year start, year end. E.g.: 1990, 1995

---

44. If the intensity of impact changed during the study period, indicate the start and end of PERIOD 4:

year start, year end. E.g.: 1990, 1995

---

45. If the intensity of impact changed during the study period, indicate the start and end of PERIOD 5:

year start, year end. E.g.: 1990, 1995

---

46. Comments

---



---



---



---



---

## Artificial elements of landscape (e.g. wind turbines)

---

47. Estimate the intensity of the impact of artificial elements of landscape at the site:

If intensity was constant or null throughout the whole study, fill in the first row only. If intensity changed during the study period, identify periods of constant impact (maximum 5 periods) and provide an estimate of the impact in each of the identified periods (rows from 2 to 6)

*Mark only one oval per row.*

|                                             | Null                  | Weak impact           | Medium impact         | Strong impact         |
|---------------------------------------------|-----------------------|-----------------------|-----------------------|-----------------------|
| Constant throughout the whole study         | <input type="radio"/> | <input type="radio"/> | <input type="radio"/> | <input type="radio"/> |
| Non-constant throughout the study: Period 1 | <input type="radio"/> | <input type="radio"/> | <input type="radio"/> | <input type="radio"/> |
| Non-constant throughout the study: Period 2 | <input type="radio"/> | <input type="radio"/> | <input type="radio"/> | <input type="radio"/> |
| Non-constant throughout the study: Period 3 | <input type="radio"/> | <input type="radio"/> | <input type="radio"/> | <input type="radio"/> |
| Non-constant throughout the study: Period 4 | <input type="radio"/> | <input type="radio"/> | <input type="radio"/> | <input type="radio"/> |
| Non-constant throughout the study: Period 5 | <input type="radio"/> | <input type="radio"/> | <input type="radio"/> | <input type="radio"/> |

48. If the intensity of impact changed during the study period, indicate the start and end of PERIOD 1:

year start, year end. E.g.: 1990, 1995

---

49. If the intensity of impact changed during the study period, indicate the start and end of PERIOD 2:

year start, year end. E.g.: 1990, 1995

---

50. If the intensity of impact changed during the study period, indicate the start and end of PERIOD 3:

year start, year end. E.g.: 1990, 1995

---

51. If the intensity of impact changed during the study period, indicate the start and end of PERIOD 4:

year start, year end. E.g.: 1990, 1995

---

52. If the intensity of impact changed during the study period, indicate the start and end of PERIOD 5:

year start, year end. E.g.: 1990, 1995

---

53. Comments

---



---



---



---



---

## Sources of pollution/nutrients

---

54. Estimate the intensity of the impact of pollution/nutrients at the site:

If intensity was constant or null throughout the whole study, fill in the first row only. If intensity changed during the study period, identify periods of constant impact (maximum 5 periods) and provide an estimate of the impact in each of the identified periods (rows from 2 to 6)

*Mark only one oval per row.*

|                                             | Null                  | Weak impact           | Medium impact         | Strong impact         |
|---------------------------------------------|-----------------------|-----------------------|-----------------------|-----------------------|
| Constant throughout the whole study         | <input type="radio"/> | <input type="radio"/> | <input type="radio"/> | <input type="radio"/> |
| Non-constant throughout the study: Period 1 | <input type="radio"/> | <input type="radio"/> | <input type="radio"/> | <input type="radio"/> |
| Non-constant throughout the study: Period 2 | <input type="radio"/> | <input type="radio"/> | <input type="radio"/> | <input type="radio"/> |
| Non-constant throughout the study: Period 3 | <input type="radio"/> | <input type="radio"/> | <input type="radio"/> | <input type="radio"/> |
| Non-constant throughout the study: Period 4 | <input type="radio"/> | <input type="radio"/> | <input type="radio"/> | <input type="radio"/> |
| Non-constant throughout the study: Period 5 | <input type="radio"/> | <input type="radio"/> | <input type="radio"/> | <input type="radio"/> |



55. **If the intensity of impact changed during the study period, indicate the start and end of PERIOD 1:**

year start, year end. E.g.: 1990, 1995

---

56. **If the intensity of impact changed during the study period, indicate the start and end of PERIOD 2:**

year start, year end. E.g.: 1990, 1995

---

57. **If the intensity of impact changed during the study period, indicate the start and end of PERIOD 3:**

year start, year end. E.g.: 1990, 1995

---

58. **If the intensity of impact changed during the study period, indicate the start and end of PERIOD 4:**

year start, year end. E.g.: 1990, 1995

---

59. **If the intensity of impact changed during the study period, indicate the start and end of PERIOD 5:**

year start, year end. E.g.: 1990, 1995

---

60. **Comments**

---

---

---

---

---

## **Additional pressures and major changes at the site**

61. **Did other major changes occur at the site and its surroundings that could have affected the biodiversity trends during the study period? (e.g. additional pressures, changes in nutrient inputs/deposition, changes in levels of acidification, parasite/disease outbreaks, changed pressure by predators, increased/decreased availability of resources, etc...)** \*

*Mark only one oval.*

- Yes
- No
- Don't know

**62. If yes, explain WHAT happened and WHEN**

---

---

---

---

---

## Overall site assessment

---

**63. Estimate the quality (=naturalness) of the site:**

If quality was constant throughout the whole study, fill in the first row only. If quality changed during the study period, identify periods of constant quality (maximum 5 periods) and provide an estimate of the quality in each of the identified periods (rows from 2 to 6)

*Mark only one oval per row.*

|                                             | Bad                   | Poor                  | Moderate              | Good                  | High                  |
|---------------------------------------------|-----------------------|-----------------------|-----------------------|-----------------------|-----------------------|
| Constant throughout the whole study         | <input type="radio"/> | <input type="radio"/> | <input type="radio"/> | <input type="radio"/> | <input type="radio"/> |
| Non-constant throughout the study: Period 1 | <input type="radio"/> | <input type="radio"/> | <input type="radio"/> | <input type="radio"/> | <input type="radio"/> |
| Non-constant throughout the study: Period 2 | <input type="radio"/> | <input type="radio"/> | <input type="radio"/> | <input type="radio"/> | <input type="radio"/> |
| Non-constant throughout the study: Period 3 | <input type="radio"/> | <input type="radio"/> | <input type="radio"/> | <input type="radio"/> | <input type="radio"/> |
| Non-constant throughout the study: Period 4 | <input type="radio"/> | <input type="radio"/> | <input type="radio"/> | <input type="radio"/> | <input type="radio"/> |
| Non-constant throughout the study: Period 5 | <input type="radio"/> | <input type="radio"/> | <input type="radio"/> | <input type="radio"/> | <input type="radio"/> |

**64. If the quality changed during the study period, indicate the start and end of PERIOD 1:**

year start, year end. E.g.: 1990, 1995

---

**65. If quality changed during the study period, indicate the start and end of PERIOD 2:**

year start, year end. E.g.: 1990, 1995

---

**66. If quality changed during the study period, indicate the start and end of PERIOD 3:**

year start, year end. E.g.: 1990, 1995

---

**67. If quality changed during the study period, indicate the start and end of PERIOD 4:**

year start, year end. E.g.: 1990, 1995

---

**68. If quality changed during the study period, indicate the start and end of PERIOD 5:**

year start, year end. E.g.: 1990, 1995

---

**69. Comments**

---

---

---

---

---

## Thank you!

---

*Stop filling out this form.*

### Impacts at the site - Freshwater ecosystems

You are asked to estimate the impact of a series of pressures acting at the site: 1) urban/industrial, 2) agriculture/pasture/forestry, 3) aquaculture, 4) mining/extraction, 5) recreational activities, 6) fishing/hunting, 7) hydrological alterations, 8) morphological alterations of the aquatic environment, 9) morphological alterations of the riparian/costal environment, 10) harbours/marinas/navigation, 11) pollution/nutrients/warm water

You can also indicate whether there are additional pressures or whether major changes occurred at the site during the study period.

At the end of the section you are asked to estimate the overall quality (=naturalness) of the site.

### Urban/industrial

---

**70. Estimate the intensity of the urban/industrial impact at the site:**

If intensity was constant or null throughout the whole study, fill in the first row only. If intensity changed during the study period, identify periods of constant impact (maximum 5 periods) and provide an estimate of the impact in each of the identified periods (rows from 2 to 6)

*Mark only one oval per row.*

|                                             | Null                  | Weak impact           | Medium impact         | Strong impact         |
|---------------------------------------------|-----------------------|-----------------------|-----------------------|-----------------------|
| Constant throughout the whole study         | <input type="radio"/> | <input type="radio"/> | <input type="radio"/> | <input type="radio"/> |
| Non-constant throughout the study: Period 1 | <input type="radio"/> | <input type="radio"/> | <input type="radio"/> | <input type="radio"/> |
| Non-constant throughout the study: Period 2 | <input type="radio"/> | <input type="radio"/> | <input type="radio"/> | <input type="radio"/> |
| Non-constant throughout the study: Period 3 | <input type="radio"/> | <input type="radio"/> | <input type="radio"/> | <input type="radio"/> |
| Non-constant throughout the study: Period 4 | <input type="radio"/> | <input type="radio"/> | <input type="radio"/> | <input type="radio"/> |
| Non-constant throughout the study: Period 5 | <input type="radio"/> | <input type="radio"/> | <input type="radio"/> | <input type="radio"/> |

**71. If the intensity of impact changed during the study period, indicate the start and end of PERIOD 1:**

year start, year end. E.g.: 1990, 1995

---

72. If the intensity of impact changed during the study period, indicate the start and end of PERIOD 2:

year start, year end. E.g.: 1990, 1995

---

73. If the intensity of impact changed during the study period, indicate the start and end of PERIOD 3:

year start, year end. E.g.: 1990, 1995

---

74. If the intensity of impact changed during the study period, indicate the start and end of PERIOD 4:

year start, year end. E.g.: 1990, 1995

---

75. If the intensity of impact changed during the study period, indicate the start and end of PERIOD 5:

year start, year end. E.g.: 1990, 1995

---

76. Comments

---



---



---



---



---

## Agriculture/pasture/forestry

---

77. Estimate the intensity of the agriculture/pasture/forestry impact at the site:

If intensity was constant or null throughout the whole study, fill in the first row only. If intensity changed during the study period, identify periods of constant impact (maximum 5 periods) and provide an estimate of the impact in each of the identified periods (rows from 2 to 6)

*Mark only one oval per row.*

|                                             | Null                  | Weak impact           | Medium impact         | Strong impact         |
|---------------------------------------------|-----------------------|-----------------------|-----------------------|-----------------------|
| Constant throughout the whole study         | <input type="radio"/> | <input type="radio"/> | <input type="radio"/> | <input type="radio"/> |
| Non-constant throughout the study: Period 1 | <input type="radio"/> | <input type="radio"/> | <input type="radio"/> | <input type="radio"/> |
| Non-constant throughout the study: Period 2 | <input type="radio"/> | <input type="radio"/> | <input type="radio"/> | <input type="radio"/> |
| Non-constant throughout the study: Period 3 | <input type="radio"/> | <input type="radio"/> | <input type="radio"/> | <input type="radio"/> |
| Non-constant throughout the study: Period 4 | <input type="radio"/> | <input type="radio"/> | <input type="radio"/> | <input type="radio"/> |
| Non-constant throughout the study: Period 5 | <input type="radio"/> | <input type="radio"/> | <input type="radio"/> | <input type="radio"/> |

**78. If the intensity of impact changed during the study period, indicate the start and end of PERIOD 1:**

year start, year end. E.g.: 1990, 1995

---

**79. If the intensity of impact changed during the study period, indicate the start and end of PERIOD 2:**

year start, year end. E.g.: 1990, 1995

---

**80. If the intensity of impact changed during the study period, indicate the start and end of PERIOD 3:**

year start, year end. E.g.: 1990, 1995

---

**81. If the intensity of impact changed during the study period, indicate the start and end of PERIOD 4:**

year start, year end. E.g.: 1990, 1995

---

**82. If the intensity of impact changed during the study period, indicate the start and end of PERIOD 5:**

year start, year end. E.g.: 1990, 1995

---

**83. Comments**

---

---

---

---

---

**Aquaculture**

---

**84. Estimate the intensity of the impact of aquaculture at the site:**

If intensity was constant or null throughout the whole study, fill in the first row only. If intensity changed during the study period, identify periods of constant impact (maximum 5 periods) and provide an estimate of the impact in each of the identified periods (rows from 2 to 6)

*Mark only one oval per row.*

|                                             | Null                  | Weak impact           | Medium impact         | Strong impact         |
|---------------------------------------------|-----------------------|-----------------------|-----------------------|-----------------------|
| Constant throughout the whole study         | <input type="radio"/> | <input type="radio"/> | <input type="radio"/> | <input type="radio"/> |
| Non-constant throughout the study: Period 1 | <input type="radio"/> | <input type="radio"/> | <input type="radio"/> | <input type="radio"/> |
| Non-constant throughout the study: Period 2 | <input type="radio"/> | <input type="radio"/> | <input type="radio"/> | <input type="radio"/> |
| Non-constant throughout the study: Period 3 | <input type="radio"/> | <input type="radio"/> | <input type="radio"/> | <input type="radio"/> |
| Non-constant throughout the study: Period 4 | <input type="radio"/> | <input type="radio"/> | <input type="radio"/> | <input type="radio"/> |
| Non-constant throughout the study: Period 5 | <input type="radio"/> | <input type="radio"/> | <input type="radio"/> | <input type="radio"/> |

**85. If the intensity of impact changed during the study period, indicate the start and end of PERIOD 1:**

year start, year end. E.g.: 1990, 1995

---

**86. If the intensity of impact changed during the study period, indicate the start and end of PERIOD 2:**

year start, year end. E.g.: 1990, 1995

---

**87. If the intensity of impact changed during the study period, indicate the start and end of PERIOD 3:**

year start, year end. E.g.: 1990, 1995

---

**88. If the intensity of impact changed during the study period, indicate the start and end of PERIOD 4:**

year start, year end. E.g.: 1990, 1995

---

**89. If the intensity of impact changed during the study period, indicate the start and end of PERIOD 5:**

year start, year end. E.g.: 1990, 1995

---

90. Comments

---

---

---

---

---

## Mining/extraction

---

91. Estimate the intensity of the mining/extraction impact at the site:

If intensity was constant or null throughout the whole study, fill in the first row only. If intensity changed during the study period, identify periods of constant impact (maximum 5 periods) and provide an estimate of the impact in each of the identified periods (rows from 2 to 6)  
*Mark only one oval per row.*

|                                             | Null                  | Weak impact           | Medium impact         | Strong impact         |
|---------------------------------------------|-----------------------|-----------------------|-----------------------|-----------------------|
| Constant throughout the whole study         | <input type="radio"/> | <input type="radio"/> | <input type="radio"/> | <input type="radio"/> |
| Non-constant throughout the study: Period 1 | <input type="radio"/> | <input type="radio"/> | <input type="radio"/> | <input type="radio"/> |
| Non-constant throughout the study: Period 2 | <input type="radio"/> | <input type="radio"/> | <input type="radio"/> | <input type="radio"/> |
| Non-constant throughout the study: Period 3 | <input type="radio"/> | <input type="radio"/> | <input type="radio"/> | <input type="radio"/> |
| Non-constant throughout the study: Period 4 | <input type="radio"/> | <input type="radio"/> | <input type="radio"/> | <input type="radio"/> |
| Non-constant throughout the study: Period 5 | <input type="radio"/> | <input type="radio"/> | <input type="radio"/> | <input type="radio"/> |

92. If the intensity of impact changed during the study period, indicate the start and end of PERIOD 1:

year start, year end. E.g.: 1990, 1995

---

93. If the intensity of impact changed during the study period, indicate the start and end of PERIOD 2:

year start, year end. E.g.: 1990, 1995

---

94. If the intensity of impact changed during the study period, indicate the start and end of PERIOD 3:

year start, year end. E.g.: 1990, 1995

---

95. If the intensity of impact changed during the study period, indicate the start and end of PERIOD 4:

year start, year end. E.g.: 1990, 1995

---

96. **If the intensity of impact changed during the study period, indicate the start and end of PERIOD 5:**

year start, year end. E.g.: 1990, 1995

---

97. **Comments**

---



---



---



---



---

## Recreational activities

---

98. **Estimate the intensity of the impact of recreational activities at the site:**

If intensity was constant or null throughout the whole study, fill in the first row only. If intensity changed during the study period, identify periods of constant impact (maximum 5 periods) and provide an estimate of the impact in each of the identified periods (rows from 2 to 6)

*Mark only one oval per row.*

|                                             | Null                  | Weak impact           | Medium impact         | Strong impact         |
|---------------------------------------------|-----------------------|-----------------------|-----------------------|-----------------------|
| Constant throughout the whole study         | <input type="radio"/> | <input type="radio"/> | <input type="radio"/> | <input type="radio"/> |
| Non-constant throughout the study: Period 1 | <input type="radio"/> | <input type="radio"/> | <input type="radio"/> | <input type="radio"/> |
| Non-constant throughout the study: Period 2 | <input type="radio"/> | <input type="radio"/> | <input type="radio"/> | <input type="radio"/> |
| Non-constant throughout the study: Period 3 | <input type="radio"/> | <input type="radio"/> | <input type="radio"/> | <input type="radio"/> |
| Non-constant throughout the study: Period 4 | <input type="radio"/> | <input type="radio"/> | <input type="radio"/> | <input type="radio"/> |
| Non-constant throughout the study: Period 5 | <input type="radio"/> | <input type="radio"/> | <input type="radio"/> | <input type="radio"/> |

99. **If the intensity of impact changed during the study period, indicate the start and end of PERIOD 1:**

year start, year end. E.g.: 1990, 1995

---

100. **If the intensity of impact changed during the study period, indicate the start and end of PERIOD 2:**

year start, year end. E.g.: 1990, 1995

---

101. **If the intensity of impact changed during the study period, indicate the start and end of PERIOD 3:**

year start, year end. E.g.: 1990, 1995

---



102. **If the intensity of impact changed during the study period, indicate the start and end of PERIOD 4:**

year start, year end. E.g.: 1990, 1995

---

103. **If the intensity of impact changed during the study period, indicate the start and end of PERIOD 5:**

year start, year end. E.g.: 1990, 1995

---

104. **Comments**

---



---



---



---



---

## Fishing/hunting

---

105. **Estimate the intensity of the impact of fishing/hunting at the site:**

If intensity was constant or null throughout the whole study, fill in the first row only. If intensity changed during the study period, identify periods of constant impact (maximum 5 periods) and provide an estimate of the impact in each of the identified periods (rows from 2 to 6)

*Mark only one oval per row.*

|                                             | Null                  | Weak impact           | Medium impact         | Strong impact         |
|---------------------------------------------|-----------------------|-----------------------|-----------------------|-----------------------|
| Constant throughout the whole study         | <input type="radio"/> | <input type="radio"/> | <input type="radio"/> | <input type="radio"/> |
| Non-constant throughout the study: Period 1 | <input type="radio"/> | <input type="radio"/> | <input type="radio"/> | <input type="radio"/> |
| Non-constant throughout the study: Period 2 | <input type="radio"/> | <input type="radio"/> | <input type="radio"/> | <input type="radio"/> |
| Non-constant throughout the study: Period 3 | <input type="radio"/> | <input type="radio"/> | <input type="radio"/> | <input type="radio"/> |
| Non-constant throughout the study: Period 4 | <input type="radio"/> | <input type="radio"/> | <input type="radio"/> | <input type="radio"/> |
| Non-constant throughout the study: Period 5 | <input type="radio"/> | <input type="radio"/> | <input type="radio"/> | <input type="radio"/> |

106. **If the intensity of impact changed during the study period, indicate the start and end of PERIOD 1:**

year start, year end. E.g.: 1990, 1995

---

107. **If the intensity of impact changed during the study period, indicate the start and end of PERIOD 2:**

year start, year end. E.g.: 1990, 1995

---

108. **If the intensity of impact changed during the study period, indicate the start and end of PERIOD 3:**

year start, year end. E.g.: 1990, 1995

---

109. **If the intensity of impact changed during the study period, indicate the start and end of PERIOD 4:**

year start, year end. E.g.: 1990, 1995

---

110. **If the intensity of impact changed during the study period, indicate the start and end of PERIOD 5:**

year start, year end. E.g.: 1990, 1995

---

111. **Comments**

---



---



---



---



---

## Hydrological alterations (e.g. water abstraction, dam operations)

---

112. **Estimate the intensity of the impact of hydrological alterations at the site:**

If intensity was constant or null throughout the whole study, fill in the first row only. If intensity changed during the study period, identify periods of constant impact (maximum 5 periods) and provide an estimate of the impact in each of the identified periods (rows from 2 to 6)

*Mark only one oval per row.*

|                                             | Null                  | Weak impact           | Medium impact         | Strong impact         |
|---------------------------------------------|-----------------------|-----------------------|-----------------------|-----------------------|
| Constant throughout the whole study         | <input type="radio"/> | <input type="radio"/> | <input type="radio"/> | <input type="radio"/> |
| Non-constant throughout the study: Period 1 | <input type="radio"/> | <input type="radio"/> | <input type="radio"/> | <input type="radio"/> |
| Non-constant throughout the study: Period 2 | <input type="radio"/> | <input type="radio"/> | <input type="radio"/> | <input type="radio"/> |
| Non-constant throughout the study: Period 3 | <input type="radio"/> | <input type="radio"/> | <input type="radio"/> | <input type="radio"/> |
| Non-constant throughout the study: Period 4 | <input type="radio"/> | <input type="radio"/> | <input type="radio"/> | <input type="radio"/> |
| Non-constant throughout the study: Period 5 | <input type="radio"/> | <input type="radio"/> | <input type="radio"/> | <input type="radio"/> |

113. **If the intensity of impact changed during the study period, indicate the start and end of PERIOD 1:**

year start, year end. E.g.: 1990, 1995

---

114. **If the intensity of impact changed during the study period, indicate the start and end of PERIOD 2:**

year start, year end. E.g.: 1990, 1995

---

115. **If the intensity of impact changed during the study period, indicate the start and end of PERIOD 3:**

year start, year end. E.g.: 1990, 1995

---

116. **If the intensity of impact changed during the study period, indicate the start and end of PERIOD 4:**

year start, year end. E.g.: 1990, 1995

---

117. **If the intensity of impact changed during the study period, indicate the start and end of PERIOD 5:**

year start, year end. E.g.: 1990, 1995

---

118. **Comments**

---

---

---

---

---

**Morphological alterations of the aquatic environment (e.g. embankment, channelization, installation of underwater structures such as pillars, ripraps, flow deflectors, removal of natural underwater structures such as wood logs, boulders etc...)**

---

**119. Estimate the intensity of the impact of morphological alterations of the aquatic environment at the site:**

If intensity was constant or null throughout the whole study, fill in the first row only. If intensity changed during the study period, identify periods of constant impact (maximum 5 periods) and provide an estimate of the impact in each of the identified periods (rows from 2 to 6)

*Mark only one oval per row.*

|                                             | Null                  | Weak impact           | Medium impact         | Strong impact         |
|---------------------------------------------|-----------------------|-----------------------|-----------------------|-----------------------|
| Constant throughout the whole study         | <input type="radio"/> | <input type="radio"/> | <input type="radio"/> | <input type="radio"/> |
| Non-constant throughout the study: Period 1 | <input type="radio"/> | <input type="radio"/> | <input type="radio"/> | <input type="radio"/> |
| Non-constant throughout the study: Period 2 | <input type="radio"/> | <input type="radio"/> | <input type="radio"/> | <input type="radio"/> |
| Non-constant throughout the study: Period 3 | <input type="radio"/> | <input type="radio"/> | <input type="radio"/> | <input type="radio"/> |
| Non-constant throughout the study: Period 4 | <input type="radio"/> | <input type="radio"/> | <input type="radio"/> | <input type="radio"/> |
| Non-constant throughout the study: Period 5 | <input type="radio"/> | <input type="radio"/> | <input type="radio"/> | <input type="radio"/> |

**120. If the intensity of impact changed during the study period, indicate the start and end of PERIOD 1:**

year start, year end. E.g.: 1990, 1995

---

**121. If the intensity of impact changed during the study period, indicate the start and end of PERIOD 2:**

year start, year end. E.g.: 1990, 1995

---

**122. If the intensity of impact changed during the study period, indicate the start and end of PERIOD 3:**

year start, year end. E.g.: 1990, 1995

---

**123. If the intensity of impact changed during the study period, indicate the start and end of PERIOD 4:**

year start, year end. E.g.: 1990, 1995

---

**124. If the intensity of impact changed during the study period, indicate the start and end of PERIOD 5:**

year start, year end. E.g.: 1990, 1995

---

125. Comments

---



---



---



---



---

**Morphological alterations of the riparian/costal environment (e.g. removal of riparian/fringing vegetation)**

---

**126. Estimate the intensity of the impact of morphological alterations of the riparian/costal environment at the site:**

If intensity was constant or null throughout the whole study, fill in the first row only. If intensity changed during the study period, identify periods of constant impact (maximum 5 periods) and provide an estimate of the impact in each of the identified periods (rows from 2 to 6)

*Mark only one oval per row.*

|                                             | Null                  | Weak impact           | Medium impact         | Strong impact         |
|---------------------------------------------|-----------------------|-----------------------|-----------------------|-----------------------|
| Constant throughout the whole study         | <input type="radio"/> | <input type="radio"/> | <input type="radio"/> | <input type="radio"/> |
| Non-constant throughout the study: Period 1 | <input type="radio"/> | <input type="radio"/> | <input type="radio"/> | <input type="radio"/> |
| Non-constant throughout the study: Period 2 | <input type="radio"/> | <input type="radio"/> | <input type="radio"/> | <input type="radio"/> |
| Non-constant throughout the study: Period 3 | <input type="radio"/> | <input type="radio"/> | <input type="radio"/> | <input type="radio"/> |
| Non-constant throughout the study: Period 4 | <input type="radio"/> | <input type="radio"/> | <input type="radio"/> | <input type="radio"/> |
| Non-constant throughout the study: Period 5 | <input type="radio"/> | <input type="radio"/> | <input type="radio"/> | <input type="radio"/> |

**127. If the intensity of impact changed during the study period, indicate the start and end of PERIOD 1:**

year start, year end. E.g.: 1990, 1995

---

**128. If the intensity of impact changed during the study period, indicate the start and end of PERIOD 2:**

year start, year end. E.g.: 1990, 1995

---

**129. If the intensity of impact changed during the study period, indicate the start and end of PERIOD 3:**

year start, year end. E.g.: 1990, 1995

---

**130. If the intensity of impact changed during the study period, indicate the start and end of PERIOD 4:**

year start, year end. E.g.: 1990, 1995

---

131. **If the intensity of impact changed during the study period, indicate the start and end of PERIOD 5:**

year start, year end. E.g.: 1990, 1995

---

132. **Comments**

---

---

---

---

---

## **Harbours/marinas/navigation**

---

133. **Estimate the intensity of the impact of harbours/marinas/navigation at the site:**

If intensity was constant or null throughout the whole study, fill in the first row only. If intensity changed during the study period, identify periods of constant impact (maximum 5 periods) and provide an estimate of the impact in each of the identified periods (rows from 2 to 6)

*Mark only one oval per row.*

|                                             | Null                  | Weak impact           | Medium impact         | Strong impact         |
|---------------------------------------------|-----------------------|-----------------------|-----------------------|-----------------------|
| Constant throughout the whole study         | <input type="radio"/> | <input type="radio"/> | <input type="radio"/> | <input type="radio"/> |
| Non-constant throughout the study: Period 1 | <input type="radio"/> | <input type="radio"/> | <input type="radio"/> | <input type="radio"/> |
| Non-constant throughout the study: Period 2 | <input type="radio"/> | <input type="radio"/> | <input type="radio"/> | <input type="radio"/> |
| Non-constant throughout the study: Period 3 | <input type="radio"/> | <input type="radio"/> | <input type="radio"/> | <input type="radio"/> |
| Non-constant throughout the study: Period 4 | <input type="radio"/> | <input type="radio"/> | <input type="radio"/> | <input type="radio"/> |
| Non-constant throughout the study: Period 5 | <input type="radio"/> | <input type="radio"/> | <input type="radio"/> | <input type="radio"/> |

134. **If the intensity of impact changed during the study period, indicate the start and end of PERIOD 1:**

year start, year end. E.g.: 1990, 1995

---

135. **If the intensity of impact changed during the study period, indicate the start and end of PERIOD 2:**

year start, year end. E.g.: 1990, 1995

---

136. **If the intensity of impact changed during the study period, indicate the start and end of PERIOD 3:**

year start, year end. E.g.: 1990, 1995

---

137. **If the intensity of impact changed during the study period, indicate the start and end of PERIOD 4:**

year start, year end. E.g.: 1990, 1995

---

138. **If the intensity of impact changed during the study period, indicate the start and end of PERIOD 5:**

year start, year end. E.g.: 1990, 1995

---

139. **Comments**

---



---



---



---



---

## Sources of pollution/nutrients/warm water (e.g. from industrial sites)

---

140. **Estimate the intensity of the impact of pollution/nutrients/warm water at the site:**

If intensity was constant or null throughout the whole study, fill in the first row only. If intensity changed during the study period, identify periods of constant impact (maximum 5 periods) and provide an estimate of the impact in each of the identified periods (rows from 2 to 6)

*Mark only one oval per row.*

|                                             | Null                  | Weak impact           | Medium impact         | Strong impact         |
|---------------------------------------------|-----------------------|-----------------------|-----------------------|-----------------------|
| Constant throughout the whole study         | <input type="radio"/> | <input type="radio"/> | <input type="radio"/> | <input type="radio"/> |
| Non-constant throughout the study: Period 1 | <input type="radio"/> | <input type="radio"/> | <input type="radio"/> | <input type="radio"/> |
| Non-constant throughout the study: Period 2 | <input type="radio"/> | <input type="radio"/> | <input type="radio"/> | <input type="radio"/> |
| Non-constant throughout the study: Period 3 | <input type="radio"/> | <input type="radio"/> | <input type="radio"/> | <input type="radio"/> |
| Non-constant throughout the study: Period 4 | <input type="radio"/> | <input type="radio"/> | <input type="radio"/> | <input type="radio"/> |
| Non-constant throughout the study: Period 5 | <input type="radio"/> | <input type="radio"/> | <input type="radio"/> | <input type="radio"/> |

141. **If the intensity of impact changed during the study period, indicate the start and end of PERIOD 1:**

year start, year end. E.g.: 1990, 1995

---

142. **If the intensity of impact changed during the study period, indicate the start and end of PERIOD 2:**

year start, year end. E.g.: 1990, 1995

---

143. **If the intensity of impact changed during the study period, indicate the start and end of PERIOD 3:**

year start, year end. E.g.: 1990, 1995

---

144. **If the intensity of impact changed during the study period, indicate the start and end of PERIOD 4:**

year start, year end. E.g.: 1990, 1995

---

145. **If the intensity of impact changed during the study period, indicate the start and end of PERIOD 5:**

year start, year end. E.g.: 1990, 1995

---

146. **Comments**

---

---

---

---

---

## **Additional pressures and major changes at the site**

---

147. **Did other major changes occur at the site and its surroundings that could have affected the biodiversity trends during the study period? (e.g. additional pressures, changes in nutrient inputs/deposition, changes in levels of acidification, parasite/disease outbreaks, changed pressure by predators, increased/decreased availability of resources, etc...)** \*

*Mark only one oval.*

- Yes
- No
- Don't know

148. **If yes, explain WHAT happened and WHEN**

---

---

---

---

---

## **Overall site assessment**

---



**149. Estimate the quality (=naturalness) of the site:**

If quality was constant throughout the whole study, fill in the first row only. If quality changed during the study period, identify periods of constant quality (maximum 5) and provide an estimate of the quality in each of the identified periods (rows from 2 to 6)

*Mark only one oval per row.*

|                                             | Bad                   | Poor                  | Moderate              | Good                  | High                  |
|---------------------------------------------|-----------------------|-----------------------|-----------------------|-----------------------|-----------------------|
| Constant throughout the whole study         | <input type="radio"/> | <input type="radio"/> | <input type="radio"/> | <input type="radio"/> | <input type="radio"/> |
| Non-constant throughout the study: Period 1 | <input type="radio"/> | <input type="radio"/> | <input type="radio"/> | <input type="radio"/> | <input type="radio"/> |
| Non-constant throughout the study: Period 2 | <input type="radio"/> | <input type="radio"/> | <input type="radio"/> | <input type="radio"/> | <input type="radio"/> |
| Non-constant throughout the study: Period 3 | <input type="radio"/> | <input type="radio"/> | <input type="radio"/> | <input type="radio"/> | <input type="radio"/> |
| Non-constant throughout the study: Period 4 | <input type="radio"/> | <input type="radio"/> | <input type="radio"/> | <input type="radio"/> | <input type="radio"/> |
| Non-constant throughout the study: Period 5 | <input type="radio"/> | <input type="radio"/> | <input type="radio"/> | <input type="radio"/> | <input type="radio"/> |

**150. If quality changed during the study period, indicate the start and end of PERIOD 1:**

year start, year end. E.g.: 1990, 1995

---

**151. If quality changed during the study period, indicate the start and end of PERIOD 2:**

year start, year end. E.g.: 1990, 1995

---

**152. If quality changed during the study period, indicate the start and end of PERIOD 3:**

year start, year end. E.g.: 1990, 1995

---

**153. If quality changed during the study period, indicate the start and end of PERIOD 4:**

year start, year end. E.g.: 1990, 1995

---

**154. If quality changed during the study period, indicate the start and end of PERIOD 5:**

year start, year end. E.g.: 1990, 1995

---

**155. Comments**

---

---

---

---

---

**156. Are water temperature data available for the whole study period?**

Mark only one oval.

- Yes  
 No

## Thank you!

---

Stop filling out this form.

### Impacts at the site - Marine and transitional ecosystems

You are asked to estimate the impact of a series of pressures acting at the site: 1) urban/industrial, 2) agriculture/pasture/forestry, 3) aquaculture, 4) mining/extraction, 5) recreational activities, 6) fishing/hunting, 7) offshore drilling, 8) morphological alterations of the aquatic environment, 9) morphological alterations of the riparian/costal environment, 10) harbours/marinas/navigation, 11) pollution/nutrients/warm water

You can also indicate whether there are additional pressures or whether major changes occurred at the site during the study period.

At the end of the section you are asked to estimate the overall quality (=naturalness) of the site.

### Urban/industrial

---

**157. Estimate the intensity of the urban/industrial impact at the site:**

If intensity was constant or null throughout the whole study, fill in the first row only. If intensity changed during the study period, identify periods of constant impact (maximum 5 periods) and provide an estimate of the impact in each of the identified periods (rows from 2 to 6)

Mark only one oval per row.

|                                             | Null                  | Weak impact           | Medium impact         | Strong impact         |
|---------------------------------------------|-----------------------|-----------------------|-----------------------|-----------------------|
| Constant throughout the whole study         | <input type="radio"/> | <input type="radio"/> | <input type="radio"/> | <input type="radio"/> |
| Non-constant throughout the study: Period 1 | <input type="radio"/> | <input type="radio"/> | <input type="radio"/> | <input type="radio"/> |
| Non-constant throughout the study: Period 2 | <input type="radio"/> | <input type="radio"/> | <input type="radio"/> | <input type="radio"/> |
| Non-constant throughout the study: Period 3 | <input type="radio"/> | <input type="radio"/> | <input type="radio"/> | <input type="radio"/> |
| Non-constant throughout the study: Period 4 | <input type="radio"/> | <input type="radio"/> | <input type="radio"/> | <input type="radio"/> |
| Non-constant throughout the study: Period 5 | <input type="radio"/> | <input type="radio"/> | <input type="radio"/> | <input type="radio"/> |

**158. If the intensity of impact changed during the study period, indicate the start and end of PERIOD 1:**

year start, year end. E.g.: 1990, 1995

\_\_\_\_\_

**159. If the intensity of impact changed during the study period, indicate the start and end of PERIOD 2:**

year start, year end. E.g.: 1990, 1995

\_\_\_\_\_

160. **If the intensity of impact changed during the study period, indicate the start and end of PERIOD 3:**

year start, year end. E.g.: 1990, 1995

---

161. **If the intensity of impact changed during the study period, indicate the start and end of PERIOD 4:**

year start, year end. E.g.: 1990, 1995

---

162. **If the intensity of impact changed during the study period, indicate the start and end of PERIOD 5:**

year start, year end. E.g.: 1990, 1995

---

163. **Comments**

---



---



---



---



---

## Agriculture/pasture/forestry

---

164. **Estimate the intensity of the agriculture/pasture/forestry impact at the site:**

If intensity was constant or null throughout the whole study, fill in the first row only. If intensity changed during the study period, identify periods of constant impact (maximum 5 periods) and provide an estimate of the impact in each of the identified periods (rows from 2 to 6)

*Mark only one oval per row.*

|                                             | Null                  | Weak impact           | Medium impact         | Strong impact         |
|---------------------------------------------|-----------------------|-----------------------|-----------------------|-----------------------|
| Constant throughout the whole study         | <input type="radio"/> | <input type="radio"/> | <input type="radio"/> | <input type="radio"/> |
| Non-constant throughout the study: Period 1 | <input type="radio"/> | <input type="radio"/> | <input type="radio"/> | <input type="radio"/> |
| Non-constant throughout the study: Period 2 | <input type="radio"/> | <input type="radio"/> | <input type="radio"/> | <input type="radio"/> |
| Non-constant throughout the study: Period 3 | <input type="radio"/> | <input type="radio"/> | <input type="radio"/> | <input type="radio"/> |
| Non-constant throughout the study: Period 4 | <input type="radio"/> | <input type="radio"/> | <input type="radio"/> | <input type="radio"/> |
| Non-constant throughout the study: Period 5 | <input type="radio"/> | <input type="radio"/> | <input type="radio"/> | <input type="radio"/> |

165. **If the intensity of impact changed during the study period, indicate the start and end of PERIOD 1:**

year start, year end. E.g.: 1990, 1995

---

166. **If the intensity of impact changed during the study period, indicate the start and end of PERIOD 2:**

year start, year end. E.g.: 1990, 1995

---

167. **If the intensity of impact changed during the study period, indicate the start and end of PERIOD 3:**

year start, year end. E.g.: 1990, 1995

---

168. **If the intensity of impact changed during the study period, indicate the start and end of PERIOD 4:**

year start, year end. E.g.: 1990, 1995

---

169. **If the intensity of impact changed during the study period, indicate the start and end of PERIOD 5:**

year start, year end. E.g.: 1990, 1995

---

170. **Comments**

---



---



---



---



---

## Aquaculture

---

171. **Estimate the intensity of the impact of aquaculture at the site:**

If intensity was constant or null throughout the whole study, fill in the first row only. If intensity changed during the study period, identify periods of constant impact (maximum 5 periods) and provide an estimate of the impact in each of the identified periods (rows from 2 to 6)

*Mark only one oval per row.*

|                                             | Null                  | Weak impact           | Medium impact         | Strong impact         |
|---------------------------------------------|-----------------------|-----------------------|-----------------------|-----------------------|
| Constant throughout the whole study         | <input type="radio"/> | <input type="radio"/> | <input type="radio"/> | <input type="radio"/> |
| Non-constant throughout the study: Period 1 | <input type="radio"/> | <input type="radio"/> | <input type="radio"/> | <input type="radio"/> |
| Non-constant throughout the study: Period 2 | <input type="radio"/> | <input type="radio"/> | <input type="radio"/> | <input type="radio"/> |
| Non-constant throughout the study: Period 3 | <input type="radio"/> | <input type="radio"/> | <input type="radio"/> | <input type="radio"/> |
| Non-constant throughout the study: Period 4 | <input type="radio"/> | <input type="radio"/> | <input type="radio"/> | <input type="radio"/> |
| Non-constant throughout the study: Period 5 | <input type="radio"/> | <input type="radio"/> | <input type="radio"/> | <input type="radio"/> |

172. **If the intensity of impact changed during the study period, indicate the start and end of PERIOD 1:**

year start, year end. E.g.: 1990, 1995

---

173. **If the intensity of impact changed during the study period, indicate the start and end of PERIOD 2:**

year start, year end. E.g.: 1990, 1995

---

174. **If the intensity of impact changed during the study period, indicate the start and end of PERIOD 3:**

year start, year end. E.g.: 1990, 1995

---

175. **If the intensity of impact changed during the study period, indicate the start and end of PERIOD 4:**

year start, year end. E.g.: 1990, 1995

---

176. **If the intensity of impact changed during the study period, indicate the start and end of PERIOD 5:**

year start, year end. E.g.: 1990, 1995

---

177. **Comments**

---

---

---

---

---

## **Mining/extraction**

---

**178. Estimate the intensity of the mining/extraction impact at the site:**

If intensity was constant or null throughout the whole study, fill in the first row only. If intensity changed during the study period, identify periods of constant impact (maximum 5 periods) and provide an estimate of the impact in each of the identified periods (rows from 2 to 6)

*Mark only one oval per row.*

|                                             | Null                  | Weak impact           | Medium impact         | Strong impact         |
|---------------------------------------------|-----------------------|-----------------------|-----------------------|-----------------------|
| Constant throughout the whole study         | <input type="radio"/> | <input type="radio"/> | <input type="radio"/> | <input type="radio"/> |
| Non-constant throughout the study: Period 1 | <input type="radio"/> | <input type="radio"/> | <input type="radio"/> | <input type="radio"/> |
| Non-constant throughout the study: Period 2 | <input type="radio"/> | <input type="radio"/> | <input type="radio"/> | <input type="radio"/> |
| Non-constant throughout the study: Period 3 | <input type="radio"/> | <input type="radio"/> | <input type="radio"/> | <input type="radio"/> |
| Non-constant throughout the study: Period 4 | <input type="radio"/> | <input type="radio"/> | <input type="radio"/> | <input type="radio"/> |
| Non-constant throughout the study: Period 5 | <input type="radio"/> | <input type="radio"/> | <input type="radio"/> | <input type="radio"/> |

**179. If the intensity of impact changed during the study period, indicate the start and end of PERIOD 1:**

year start, year end. E.g.: 1990, 1995

---

**180. If the intensity of impact changed during the study period, indicate the start and end of PERIOD 2:**

year start, year end. E.g.: 1990, 1995

---

**181. If the intensity of impact changed during the study period, indicate the start and end of PERIOD 3:**

year start, year end. E.g.: 1990, 1995

---

**182. If the intensity of impact changed during the study period, indicate the start and end of PERIOD 4**

year start, year end. E.g.: 1990, 1995

---

**183. If the intensity of impact changed during the study period, indicate the start and end of PERIOD 5:**

year start, year end. E.g.: 1990, 1995

---

184. Comments

---

---

---

---

---

## Recreational activities

---

**185. Estimate the intensity of the impact of recreational activities at the site:**

If intensity was constant or null throughout the whole study, fill in the first row only. If intensity changed during the study period, identify periods of constant impact (maximum 5 periods) and provide an estimate of the impact in each of the identified periods (rows from 2 to 6)  
*Mark only one oval per row.*

|                                             | Null                  | Weak impact           | Medium impact         | Strong impact         |
|---------------------------------------------|-----------------------|-----------------------|-----------------------|-----------------------|
| Constant throughout the whole study         | <input type="radio"/> | <input type="radio"/> | <input type="radio"/> | <input type="radio"/> |
| Non-constant throughout the study: Period 1 | <input type="radio"/> | <input type="radio"/> | <input type="radio"/> | <input type="radio"/> |
| Non-constant throughout the study: Period 2 | <input type="radio"/> | <input type="radio"/> | <input type="radio"/> | <input type="radio"/> |
| Non-constant throughout the study: Period 3 | <input type="radio"/> | <input type="radio"/> | <input type="radio"/> | <input type="radio"/> |
| Non-constant throughout the study: Period 4 | <input type="radio"/> | <input type="radio"/> | <input type="radio"/> | <input type="radio"/> |
| Non-constant throughout the study: Period 5 | <input type="radio"/> | <input type="radio"/> | <input type="radio"/> | <input type="radio"/> |

**186. If the intensity of impact changed during the study period, indicate the start and end of PERIOD 1:**

year start, year end. E.g.: 1990, 1995

---

**187. If the intensity of impact changed during the study period, indicate the start and end of PERIOD 2:**

year start, year end. E.g.: 1990, 1995

---

**188. If the intensity of impact changed during the study period, indicate the start and end of PERIOD 3:**

year start, year end. E.g.: 1990, 1995

---

**189. If the intensity of impact changed during the study period, indicate the start and end of PERIOD 4:**

year start, year end. E.g.: 1990, 1995

---

190. **If the intensity of impact changed during the study period, indicate the start and end of PERIOD 5:**

year start, year end. E.g.: 1990, 1995

\_\_\_\_\_

191. **Comments**

\_\_\_\_\_  
 \_\_\_\_\_  
 \_\_\_\_\_  
 \_\_\_\_\_  
 \_\_\_\_\_

## **Fishing/hunting**

---

192. **Estimate the intensity of the impact of fishing/hunting at the site:**

If intensity was constant or null throughout the whole study, fill in the first row only. If intensity changed during the study period, identify periods of constant impact (maximum 5 periods) and provide an estimate of the impact in each of the identified periods (rows from 2 to 6)

*Mark only one oval per row.*

|                                             | Null                  | Weak impact           | Medium impact         | Strong impact         |
|---------------------------------------------|-----------------------|-----------------------|-----------------------|-----------------------|
| Constant throughout the whole study         | <input type="radio"/> | <input type="radio"/> | <input type="radio"/> | <input type="radio"/> |
| Non-constant throughout the study: Period 1 | <input type="radio"/> | <input type="radio"/> | <input type="radio"/> | <input type="radio"/> |
| Non-constant throughout the study: Period 2 | <input type="radio"/> | <input type="radio"/> | <input type="radio"/> | <input type="radio"/> |
| Non-constant throughout the study: Period 3 | <input type="radio"/> | <input type="radio"/> | <input type="radio"/> | <input type="radio"/> |
| Non-constant throughout the study: Period 4 | <input type="radio"/> | <input type="radio"/> | <input type="radio"/> | <input type="radio"/> |
| Non-constant throughout the study: Period 5 | <input type="radio"/> | <input type="radio"/> | <input type="radio"/> | <input type="radio"/> |

193. **If the intensity of impact changed during the study period, indicate the start and end of PERIOD 1:**

year start, year end. E.g.: 1990, 1995

\_\_\_\_\_

194. **If the intensity of impact changed during the study period, indicate the start and end of PERIOD 2:**

year start, year end. E.g.: 1990, 1995

\_\_\_\_\_

195. **If the intensity of impact changed during the study period, indicate the start and end of PERIOD 3:**

year start, year end. E.g.: 1990, 1995

\_\_\_\_\_



196. **If the intensity of impact changed during the study period, indicate the start and end of PERIOD 4:**

year start, year end. E.g.: 1990, 1995

---

197. **If the intensity of impact changed during the study period, indicate the start and end of PERIOD 5:**

year start, year end. E.g.: 1990, 1995

---

198. **Comments**

---



---



---



---



---

## Offshore drilling

---

199. **Estimate the intensity of the impact of offshore drilling at the site:**

If intensity was constant or null throughout the whole study, fill in the first row only. If intensity changed during the study period, identify periods of constant impact (maximum 5 periods) and provide an estimate of the impact in each of the identified periods (rows from 2 to 6)

*Mark only one oval per row.*

|                                             | Null                  | Weak impact           | Medium impact         | Strong impact         |
|---------------------------------------------|-----------------------|-----------------------|-----------------------|-----------------------|
| Constant throughout the whole study         | <input type="radio"/> | <input type="radio"/> | <input type="radio"/> | <input type="radio"/> |
| Non-constant throughout the study: Period 1 | <input type="radio"/> | <input type="radio"/> | <input type="radio"/> | <input type="radio"/> |
| Non-constant throughout the study: Period 2 | <input type="radio"/> | <input type="radio"/> | <input type="radio"/> | <input type="radio"/> |
| Non-constant throughout the study: Period 3 | <input type="radio"/> | <input type="radio"/> | <input type="radio"/> | <input type="radio"/> |
| Non-constant throughout the study: Period 4 | <input type="radio"/> | <input type="radio"/> | <input type="radio"/> | <input type="radio"/> |
| Non-constant throughout the study: Period 5 | <input type="radio"/> | <input type="radio"/> | <input type="radio"/> | <input type="radio"/> |

200. **If the intensity of impact changed during the study period, indicate the start and end of PERIOD 1:**

year start, year end. E.g.: 1990, 1995

---

201. **If the intensity of impact changed during the study period, indicate the start and end of PERIOD 2:**

year start, year end. E.g.: 1990, 1995

---

202. **If the intensity of impact changed during the study period, indicate the start and end of PERIOD 3:**

year start, year end. E.g.: 1990, 1995

---

203. **If the intensity of impact changed during the study period, indicate the start and end of PERIOD 4:**

year start, year end. E.g.: 1990, 1995

---

204. **If the intensity of impact changed during the study period, indicate the start and end of PERIOD 5:**

year start, year end. E.g.: 1990, 1995

---

205. **Comments**

---



---



---



---



---

**Morphological alterations of the aquatic environment (e.g. embankment, channelization, installation of underwater structures such as pillars, ripraps, flow deflectors, removal of natural underwater structures such as wood logs, boulders etc...)**

---

206. **Estimate the intensity of the impact of morphological alterations of the aquatic environment at the site:**

If intensity was constant or null throughout the whole study, fill in the first row only. If intensity changed during the study period, identify periods of constant impact (maximum 5 periods) and provide an estimate of the impact in each of the identified periods (rows from 2 to 6)

*Mark only one oval per row.*

|                                             | Null                  | Weak impact           | Medium impact         | Strong impact         |
|---------------------------------------------|-----------------------|-----------------------|-----------------------|-----------------------|
| Constant throughout the whole study         | <input type="radio"/> | <input type="radio"/> | <input type="radio"/> | <input type="radio"/> |
| Non-constant throughout the study: Period 1 | <input type="radio"/> | <input type="radio"/> | <input type="radio"/> | <input type="radio"/> |
| Non-constant throughout the study: Period 2 | <input type="radio"/> | <input type="radio"/> | <input type="radio"/> | <input type="radio"/> |
| Non-constant throughout the study: Period 3 | <input type="radio"/> | <input type="radio"/> | <input type="radio"/> | <input type="radio"/> |
| Non-constant throughout the study: Period 4 | <input type="radio"/> | <input type="radio"/> | <input type="radio"/> | <input type="radio"/> |
| Non-constant throughout the study: Period 5 | <input type="radio"/> | <input type="radio"/> | <input type="radio"/> | <input type="radio"/> |

207. **If the intensity of impact changed during the study period, indicate the start and end of PERIOD 1:**

year start, year end. E.g.: 1990, 1995

---

208. **If the intensity of impact changed during the study period, indicate the start and end of PERIOD 2:**

year start, year end. E.g.: 1990, 1995

---

209. **If the intensity of impact changed during the study period, indicate the start and end of PERIOD 3:**

year start, year end. E.g.: 1990, 1995

---

210. **If the intensity of impact changed during the study period, indicate the start and end of PERIOD 4:**

year start, year end. E.g.: 1990, 1995

---

211. **If the intensity of impact changed during the study period, indicate the start and end of PERIOD 5:**

year start, year end. E.g.: 1990, 1995

---

212. **Comments**

---

---

---

---

---

**Morphological alterations of the riparian/costal environment  
(e.g. removal of riparian/fringing vegetation)**

---

**213. Estimate the intensity of the impact of morphological alterations of the riparian/costal environment at the site:**

If intensity was constant or null throughout the whole study, fill in the first row only. If intensity changed during the study period, identify periods of constant impact (maximum 5 periods) and provide an estimate of the impact in each of the identified periods (rows from 2 to 6)

*Mark only one oval per row.*

|                                             | Null                  | Weak impact           | Medium impact         | Strong impact         |
|---------------------------------------------|-----------------------|-----------------------|-----------------------|-----------------------|
| Constant throughout the whole study         | <input type="radio"/> | <input type="radio"/> | <input type="radio"/> | <input type="radio"/> |
| Non-constant throughout the study: Period 1 | <input type="radio"/> | <input type="radio"/> | <input type="radio"/> | <input type="radio"/> |
| Non-constant throughout the study: Period 2 | <input type="radio"/> | <input type="radio"/> | <input type="radio"/> | <input type="radio"/> |
| Non-constant throughout the study: Period 3 | <input type="radio"/> | <input type="radio"/> | <input type="radio"/> | <input type="radio"/> |
| Non-constant throughout the study: Period 4 | <input type="radio"/> | <input type="radio"/> | <input type="radio"/> | <input type="radio"/> |
| Non-constant throughout the study: Period 5 | <input type="radio"/> | <input type="radio"/> | <input type="radio"/> | <input type="radio"/> |

**214. If the intensity of impact changed during the study period, indicate the start and end of PERIOD 1:**

year start, year end. E.g.: 1990, 1995

---

**215. If the intensity of impact changed during the study period, indicate the start and end of PERIOD 2:**

year start, year end. E.g.: 1990, 1995

---

**216. If the intensity of impact changed during the study period, indicate the start and end of PERIOD 3:**

year start, year end. E.g.: 1990, 1995

---

**217. If the intensity of impact changed during the study period, indicate the start and end of PERIOD 4:**

year start, year end. E.g.: 1990, 1995

---

**218. If the intensity of impact changed during the study period, indicate the start and end of PERIOD 5:**

year start, year end. E.g.: 1990, 1995

---

219. Comments

---



---



---



---



---

## Harbours/marinas/navigation

---

220. Estimate the intensity of the impact of harbours/marinas/navigation at the site:

If intensity was constant or null throughout the whole study, fill in the first row only. If intensity changed during the study period, identify periods of constant impact (maximum 5 periods) and provide an estimate of the impact in each of the identified periods (rows from 2 to 6)

*Mark only one oval per row.*

|                                             | Null                  | Weak impact           | Medium impact         | Strong impact         |
|---------------------------------------------|-----------------------|-----------------------|-----------------------|-----------------------|
| Constant throughout the whole study         | <input type="radio"/> | <input type="radio"/> | <input type="radio"/> | <input type="radio"/> |
| Non-constant throughout the study: Period 1 | <input type="radio"/> | <input type="radio"/> | <input type="radio"/> | <input type="radio"/> |
| Non-constant throughout the study: Period 2 | <input type="radio"/> | <input type="radio"/> | <input type="radio"/> | <input type="radio"/> |
| Non-constant throughout the study: Period 3 | <input type="radio"/> | <input type="radio"/> | <input type="radio"/> | <input type="radio"/> |
| Non-constant throughout the study: Period 4 | <input type="radio"/> | <input type="radio"/> | <input type="radio"/> | <input type="radio"/> |
| Non-constant throughout the study: Period 5 | <input type="radio"/> | <input type="radio"/> | <input type="radio"/> | <input type="radio"/> |

221. If the intensity of impact changed during the study period, indicate the start and end of PERIOD 1:

year start, year end. E.g.: 1990, 1995

---

222. If the intensity of impact changed during the study period, indicate the start and end of PERIOD 2:

year start, year end. E.g.: 1990, 1995

---

223. If the intensity of impact changed during the study period, indicate the start and end of PERIOD 3:

year start, year end. E.g.: 1990, 1995

---

224. If the intensity of impact changed during the study period, indicate the start and end of PERIOD 4:

year start, year end. E.g.: 1990, 1995

---

225. **If the intensity of impact changed during the study period, indicate the start and end of PERIOD 5:**

year start, year end. E.g.: 1990, 1995

---

226. **Comments**

---



---



---



---



---

## Sources of pollution/nutrients/warm water (e.g. from industrial sites)

---

227. **Estimate the intensity of the impact of pollution/nutrients/warm water at the site:**

If intensity was constant or null throughout the whole study, fill in the first row only. If intensity changed during the study period, identify periods of constant impact (maximum 5 periods) and provide an estimate of the impact in each of the identified periods (rows from 2 to 6)  
*Mark only one oval per row.*

|                                             | Null                  | Weak impact           | Medium impact         | Strong impact         |
|---------------------------------------------|-----------------------|-----------------------|-----------------------|-----------------------|
| Constant throughout the whole study         | <input type="radio"/> | <input type="radio"/> | <input type="radio"/> | <input type="radio"/> |
| Non-constant throughout the study: Period 1 | <input type="radio"/> | <input type="radio"/> | <input type="radio"/> | <input type="radio"/> |
| Non-constant throughout the study: Period 2 | <input type="radio"/> | <input type="radio"/> | <input type="radio"/> | <input type="radio"/> |
| Non-constant throughout the study: Period 3 | <input type="radio"/> | <input type="radio"/> | <input type="radio"/> | <input type="radio"/> |
| Non-constant throughout the study: Period 4 | <input type="radio"/> | <input type="radio"/> | <input type="radio"/> | <input type="radio"/> |
| Non-constant throughout the study: Period 5 | <input type="radio"/> | <input type="radio"/> | <input type="radio"/> | <input type="radio"/> |

228. **If the intensity of impact changed during the study period, indicate the start and end of PERIOD 1:**

year start, year end. E.g.: 1990, 1995

---

229. **If the intensity of impact changed during the study period, indicate the start and end of PERIOD 2:**

year start, year end. E.g.: 1990, 1995

---

230. **If the intensity of impact changed during the study period, indicate the start and end of PERIOD 3:**

year start, year end. E.g.: 1990, 1995

---

231. If the intensity of impact changed during the study period, indicate the start and end of PERIOD 4:

year start, year end. E.g.: 1990, 1995

---

232. If the intensity of impact changed during the study period, indicate the start and end of PERIOD 5:

year start, year end. E.g.: 1990, 1995

---

233. Comments

---

---

---

---

---

## **Additional pressures and major changes at the site**

---

234. Did other major changes occur at the site and its surroundings that could have affected the biodiversity trends during the study period? (e.g. additional pressures, changes in nutrient inputs/deposition, changes in levels of acidification, parasite/disease outbreaks, changed pressure by predators, increased/decreased availability of resources, etc...)\*

*Mark only one oval.*

Yes

No

Don't know

235. If yes, explain WHAT happened and WHEN

---

---

---

---

---

## **Overall site assessment**

---

**236. Estimate the quality (=naturalness) of the site:**

If quality was constant throughout the whole study, fill in the first row only. If quality changed during the study period, identify periods of constant quality (maximum 5) and provide an estimate of the quality in each of the identified periods (rows from 2 to 6)

*Mark only one oval per row.*

|                                             | Bad                   | Poor                  | Moderate              | Good                  | High                  |
|---------------------------------------------|-----------------------|-----------------------|-----------------------|-----------------------|-----------------------|
| Constant throughout the whole study         | <input type="radio"/> | <input type="radio"/> | <input type="radio"/> | <input type="radio"/> | <input type="radio"/> |
| Non-constant throughout the study: Period 1 | <input type="radio"/> | <input type="radio"/> | <input type="radio"/> | <input type="radio"/> | <input type="radio"/> |
| Non-constant throughout the study: Period 2 | <input type="radio"/> | <input type="radio"/> | <input type="radio"/> | <input type="radio"/> | <input type="radio"/> |
| Non-constant throughout the study: Period 3 | <input type="radio"/> | <input type="radio"/> | <input type="radio"/> | <input type="radio"/> | <input type="radio"/> |
| Non-constant throughout the study: Period 4 | <input type="radio"/> | <input type="radio"/> | <input type="radio"/> | <input type="radio"/> | <input type="radio"/> |
| Non-constant throughout the study: Period 5 | <input type="radio"/> | <input type="radio"/> | <input type="radio"/> | <input type="radio"/> | <input type="radio"/> |

**237. If quality changed during the study period, indicate the start and end of PERIOD 1:**

year start, year end. E.g.: 1990, 1995

---

**238. If quality changed during the study period, indicate the start and end of PERIOD 2:**

year start, year end. E.g.: 1990, 1995

---

**239. If quality changed during the study period, indicate the start and end of PERIOD 3:**

year start, year end. E.g.: 1990, 1995

---

**240. If quality changed during the study period, indicate the start and end of PERIOD 4:**

year start, year end. E.g.: 1990, 1995

---

**241. If quality changed during the study period, indicate the start and end of PERIOD 5:**

year start, year end. E.g.: 1990, 1995

---

**242. Comments**

---



---



---



---



---



243. Are water temperature data available for the whole study period?

*Mark only one oval.*

Yes

No

**Thank you!**

---

---

Powered by  
 Google Forms
